# Supplementary material for: Prediction and control of number of cells in microdroplets by stochastic modeling
Source: Royal Society of Chemistry journal article supplement (doi:10.1039/c2lc40523g), 2012-01-01
Supplement: c2lc40523g.r [file c2lc40523g.r]

#RCode4Models.r
#April 2, 2011
#This file contains the models D-C3, D-C2, and R2-C2 in Ceyhan et al. article

#Valid Range of Values	      Range	Units
#Cell Concentration (XCC)	1-16	mil/ml
#Cell Radius (XCR)	      1-28	�m
#Droplet Radius (XDR)	   300-700	�m

#To run this file, you need to either run it on an R console 
#(by higlighting the code in R editor, and use Ctrl+R or under Edit click Run Selection)
# or use source("MyDocuments/....(location where this file is saved).../Models4CellEncap.r")

#################################################################
ModelDC2<-function(DR=XDR,CC=XCC)
{#estimates the NCPD values for given DR and CC values
# as XDR and XCC
#DR=droplet radius, CC=cell concentration
#logNCPD<- -11.0022-0.0247*DR+0.1890*CC+1.1528*sqrt(DR)
#NCPD<-exp(logNCPD)
NCPD<-1.6663*10^(-5)*0.9756^DR*1.2081^CC*3.1672^(sqrt(DR))
round(NCPD,0)
}

#try typing 
ModelDC2(DR=500,CC=5)

#################################################################
ModelDC3<-function(DR=XDR,CC=XCC,CR=XCR)
{#estimates the NCPD values for given DR, CC, and CR values
# as XDR, XCC, and XCR
#the model only works for 1, 2, 4, 8, 16 mil/ml CC values
#DR=droplet radius, CC=cell concentration, CR=cell radius
if (CC==1)
{
#logNCPD<- 22.0244+0.0378*DR-1.6535*sqrt(DR)-1.1267*sqrt(CR)+0.1882*CR
NCPD<-4.8345*10^9*1.0372^DR*0.2019^(sqrt(DR))*1.3594^CR*0.1686^(sqrt(CR))
}
else
{
  if (CC==2)
  {
#  logNCPD<- -50.8994-0.0962*DR+4.5695*sqrt(DR)-0.1044*sqrt(CR)
   NCPD<- 8.2390*10^(-23)*0.9081^DR*96.8620^(sqrt(DR))*0.8627^(sqrt(CR))
  }
  else
  {
    if (CC==4)
    {
#    logNCPD<- -18.6510-0.0415*DR+1.9009*sqrt(DR)+0.1833*sqrt(CR)
     NCPD<- 3.8970*10^(-9)*0.9588^DR*6.8313^(sqrt(DR))*1.1740^(sqrt(CR))
    }
    else
    {
      if (CC==8)
      {
#      logNCPD<- 6.0776+0.0084*DR-0.2629*sqrt(DR)+0.2051*sqrt(CR)-0.0330*CR
       NCPD<- 271.7956*1.0070^DR*0.8088^(sqrt(DR))*1.1030^(sqrt(CR))
      }
      else
      {
        if (CC==16)
        {
#        logNCPD<- 0.3469-0.0033*DR+0.2908*sqrt(DR)+0.0524*sqrt(CR)
        NCPD<- 1.4094*0.9967^DR*1.3299^(sqrt(DR))*1.1143^(sqrt(CR))
        }
        else
        {
        print("Error!:")
        }
      }
    }
  }
}

if (sum(CC==c(1,2,4,8,16))>0)
{
#NCPD<-exp(logNCPD)
round(NCPD,0)
}
else
{
print("Model D-C3 works only for concentration values 1, 2, 4, 8, 16 mil/ml")
}
}

#try typing 
ModelDC3(DR=500,CC=1,CR=15)
ModelDC3(DR=500,CC=2,CR=15)
ModelDC3(DR=500,CC=4,CR=15)
ModelDC3(DR=500,CC=8,CR=15)
ModelDC3(DR=500,CC=16,CR=15)

ModelDC3(DR=500,CC=10,CR=15)

#################################################################
ModelR2C2<-function(DR=XDR,CC=XCC,CR=XCR)
{#estimates the NCPD values for given DR, CC, and CR values
# as XDR, XCC, and XCR
#DR=droplet radius, CC=cell concentration, CR=cell radius
RR<-DR/CR
#logNCPD<- 2.0759+0.0019*RR+0.3500*CC-0.0096*CC^2
#NCPD<-exp(logNCPD)
NCPD<- 7.7564*1.0021^RR*1.4256^CC*0.9902^(CC^2)
round(NCPD,0)
}

#try typing 
ModelR2C2(DR=700,CC=1,CR=15)

##############
dr<-500
cc<-1
cr<-15
ModelDC2(DR=dr,CC=cc)
ModelDC3(DR=dr,CC=cc,CR=cr)
ModelR2C2(DR=dr,CC=cc,CR=cr)
